# Supplementary material
Source: PubMed Central journal article supplement (PMC3800762)

1 **Supplemental Figure 1. Maternal licking/grooming behavior during the postnatal period**

2 Mean  $\pm$  SEM LG frequency (% of observations) for Low and High LG dams (A) averaged across the first  
3 6 days postpartum, (B) on each of the first 6 days postpartum. Mean  $\pm$  SEM LG bouts (C) and average  
4 LG bout duration (D) on postpartum day 10 by Low and High LG dams. \* $p$ <0.05, \*\*\* $p$ <0.001

5

6 **Supplemental Figure 2 Post-translational histone modifications associated with offspring *Esr1***

7 Chromatin immunoprecipitation of the *Esr1* B/1b regulatory region by antibodies against (A) tri-  
8 methylated histone H3 lysine 4 (H3K4me3) or (B) tri-methylated histone H3 lysine 9 (H3K9me3). Three  
9 regions of the *Esr1* gene were examined for association with each antibody: the B promoter (-219 to -  
10 103), the B/1b regulatory region including 6 of the 14 CpG sites analyzed for methylation (+22 to +151),  
11 and within the first translated exon (exon 2, +2246 to +2479). Mean  $\pm$  SEM % of input among Low and  
12 High LG female offspring at PN6, PN21, and PN66. \* $p$ <0.05, bar indicates main effect of maternal care  
13 across ages

14

**Supplemental Table 1**

| <b>Gene</b>                | <b>NCBI #</b>  | <b>Forward-sequence</b>  | <b>Reverse-sequence</b>  |
|----------------------------|----------------|--------------------------|--------------------------|
| <i>Esr1</i>                | NM_012689.1    | GCCTTCTACAGGTCCAATTCTGAC | ACAGCACAGTAGCGAGTCTCC    |
| <i>Esr2</i>                | NM_012754.1    | GCAGAACCTCAAAAGAGTCCTTGG | ACGCCGTAATGATACCCAGATG   |
| <i>Otr</i>                 | NM_012871      | TTCTTCGTGCAGATGTGGAG     | GAGCATGTAGATCCACGGGT     |
| <i>Dnmt1</i>               | NM_053354.3    | GTGGGATGGCTTCTTCAGTA     | GGCTTGGTCACAAAACAAAC     |
| <i>Dnmt3a</i>              | NM_001003958.1 | GGGGCCCCAGCTGAAGGAGA     | GCCCCGGGAGCCCTCCATTT     |
| <i>CypA</i>                | NM_017101      | ATGGTCAACCCACCGTGTTCCTC  | ATCCTTTCTCCCCAGTGCTCAGAG |
| <i>Actb</i>                | NM_031144      | ATGGATGACGATATCGCTGCG    | GGTGACAATGCCGTGTTCAAT    |
| <i>Esr1</i> 1b<br>upstream | X98236         | AGATGGGCGCTGGAACCGGAG    | TCTGCTGTTGGCTATGTGGCTTGC |
| <i>Esr1</i> 1b<br>5'UTR    | X98236         | CACACACCGCGCCACTCGAT     | ACACCGATCCTACCCTGCTGGT   |
| <i>Esr1</i> exon1          | X98236         | CCAGGTGGCTCATCCGCTGC     | TTGAACACGGCGGGCTTGCT     |

# Supplemental Figure 1

**A** LG PN1-6

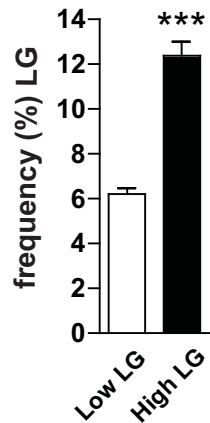

**B** LG PN1-6

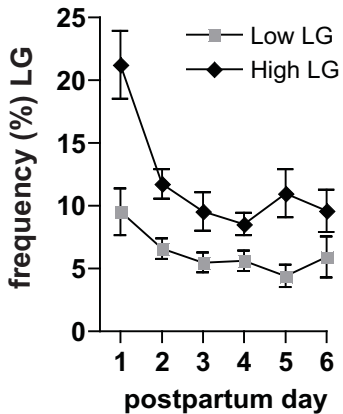

**C** LG PN10

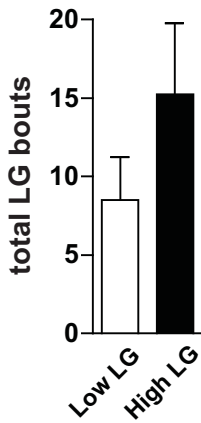

**D** LG PN10

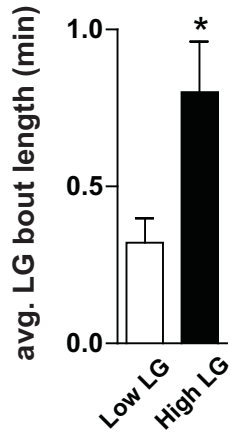

## Supplemental Figure 2

Low LG    High LG    No-Ab Control

### A H3K4me3

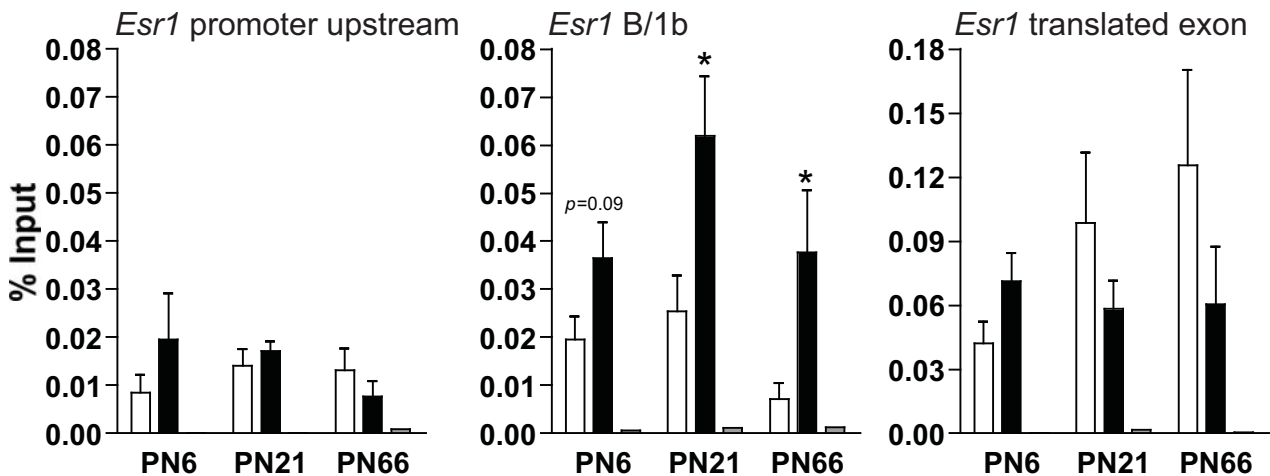

### B H3K9me3

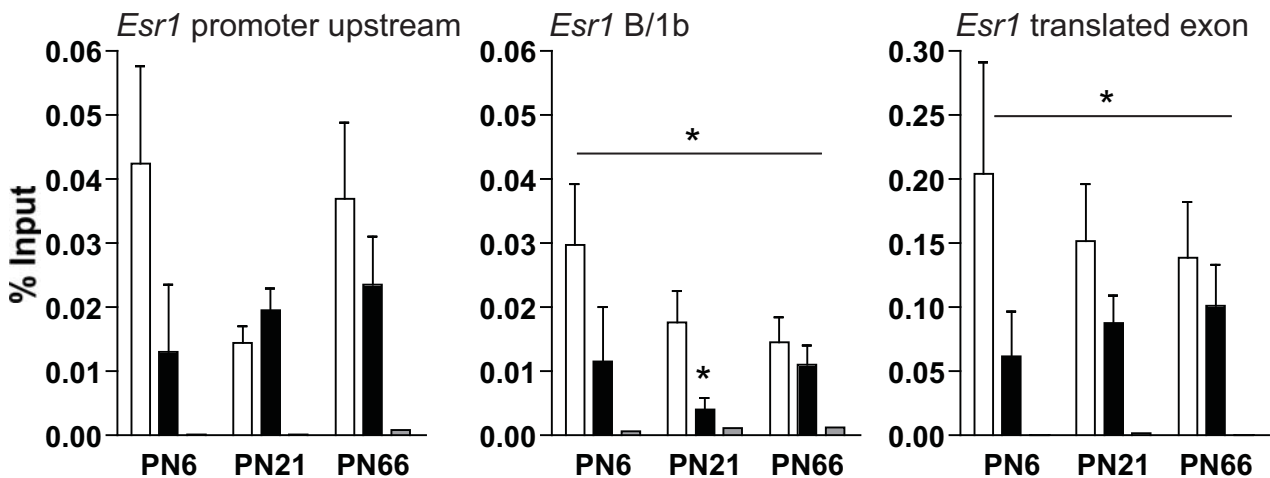

Supplement: supp_en.2013-1595v1_13-1595_1_tab_2_fig.pdf [file supp_en.2013-1595v1_13-1595_1_tab_2_fig.pdf]
